# Supplementary material
Source: Springer Nature journal article supplement (https://www.springermedizin.de/resource/supplementary/12974_2010_268_MOESM8_ESM.pdf/9601128)

nTg

rTg4510

Vehicle

LPS

Vehicle

LPS

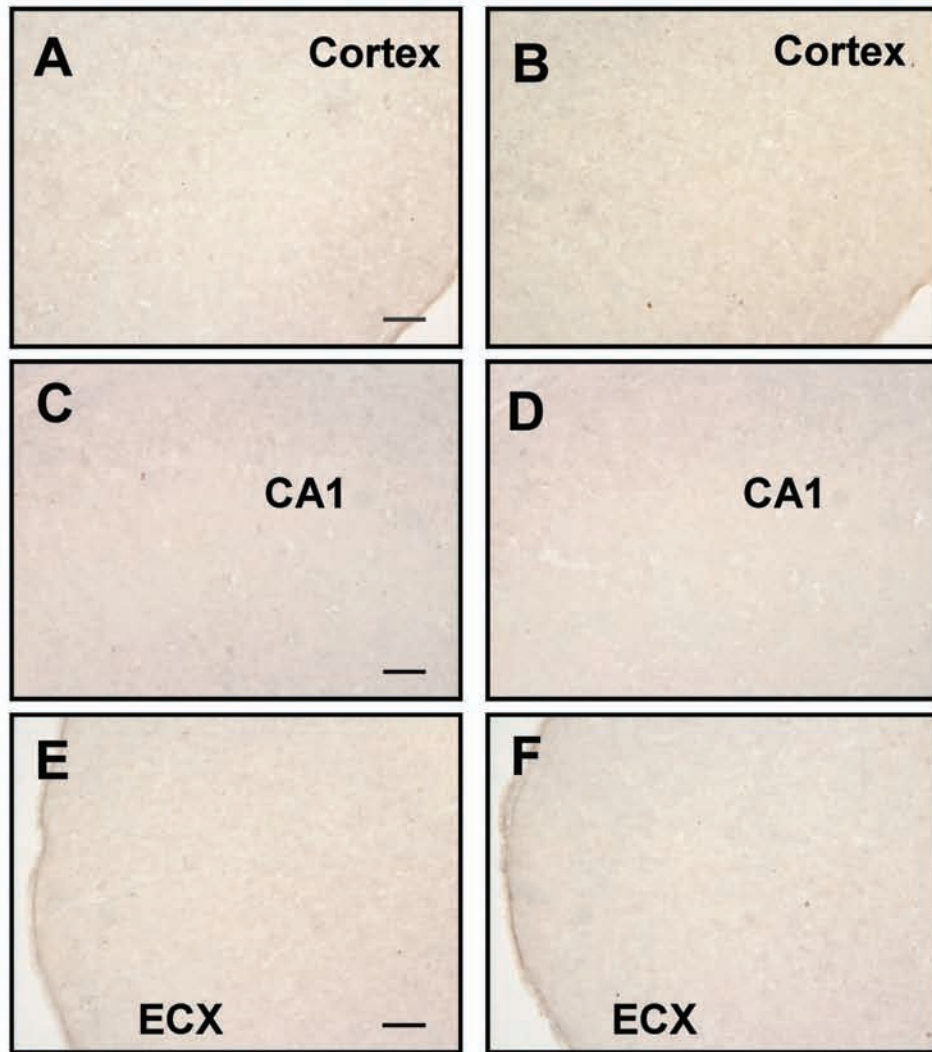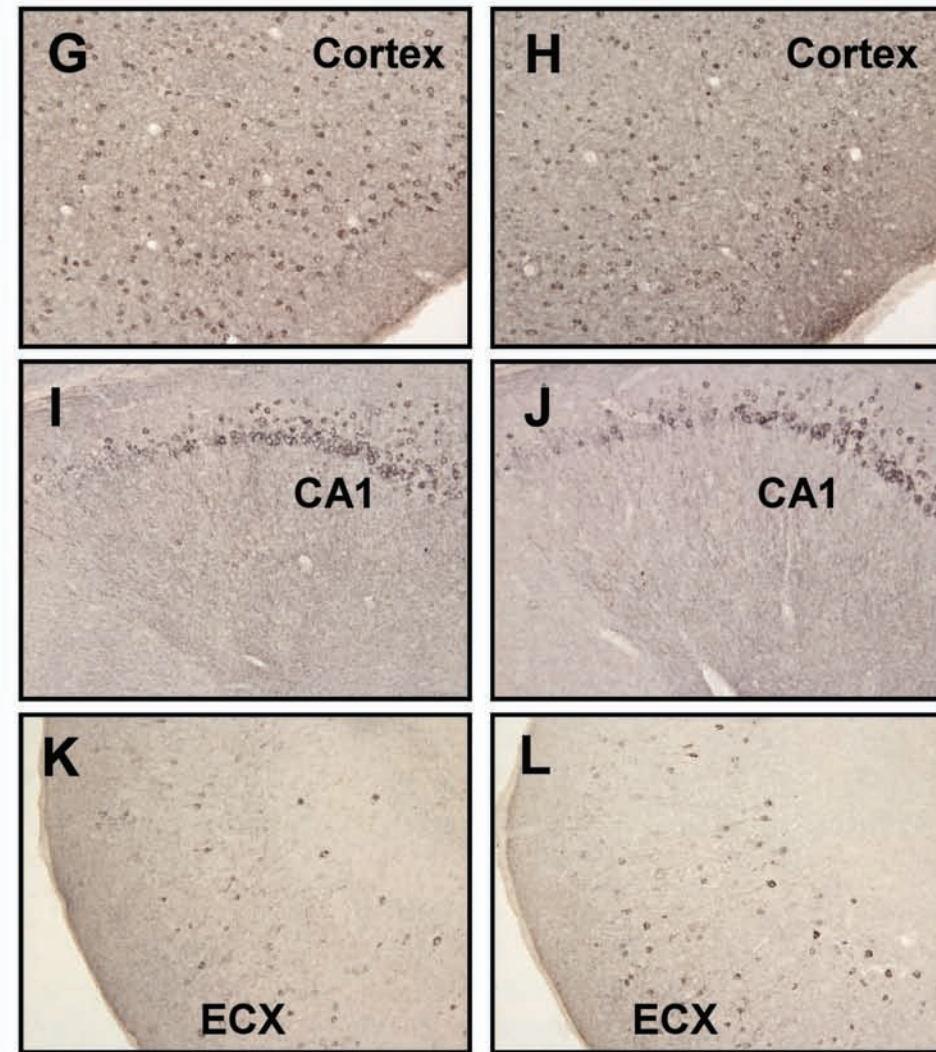

M

Total Tau

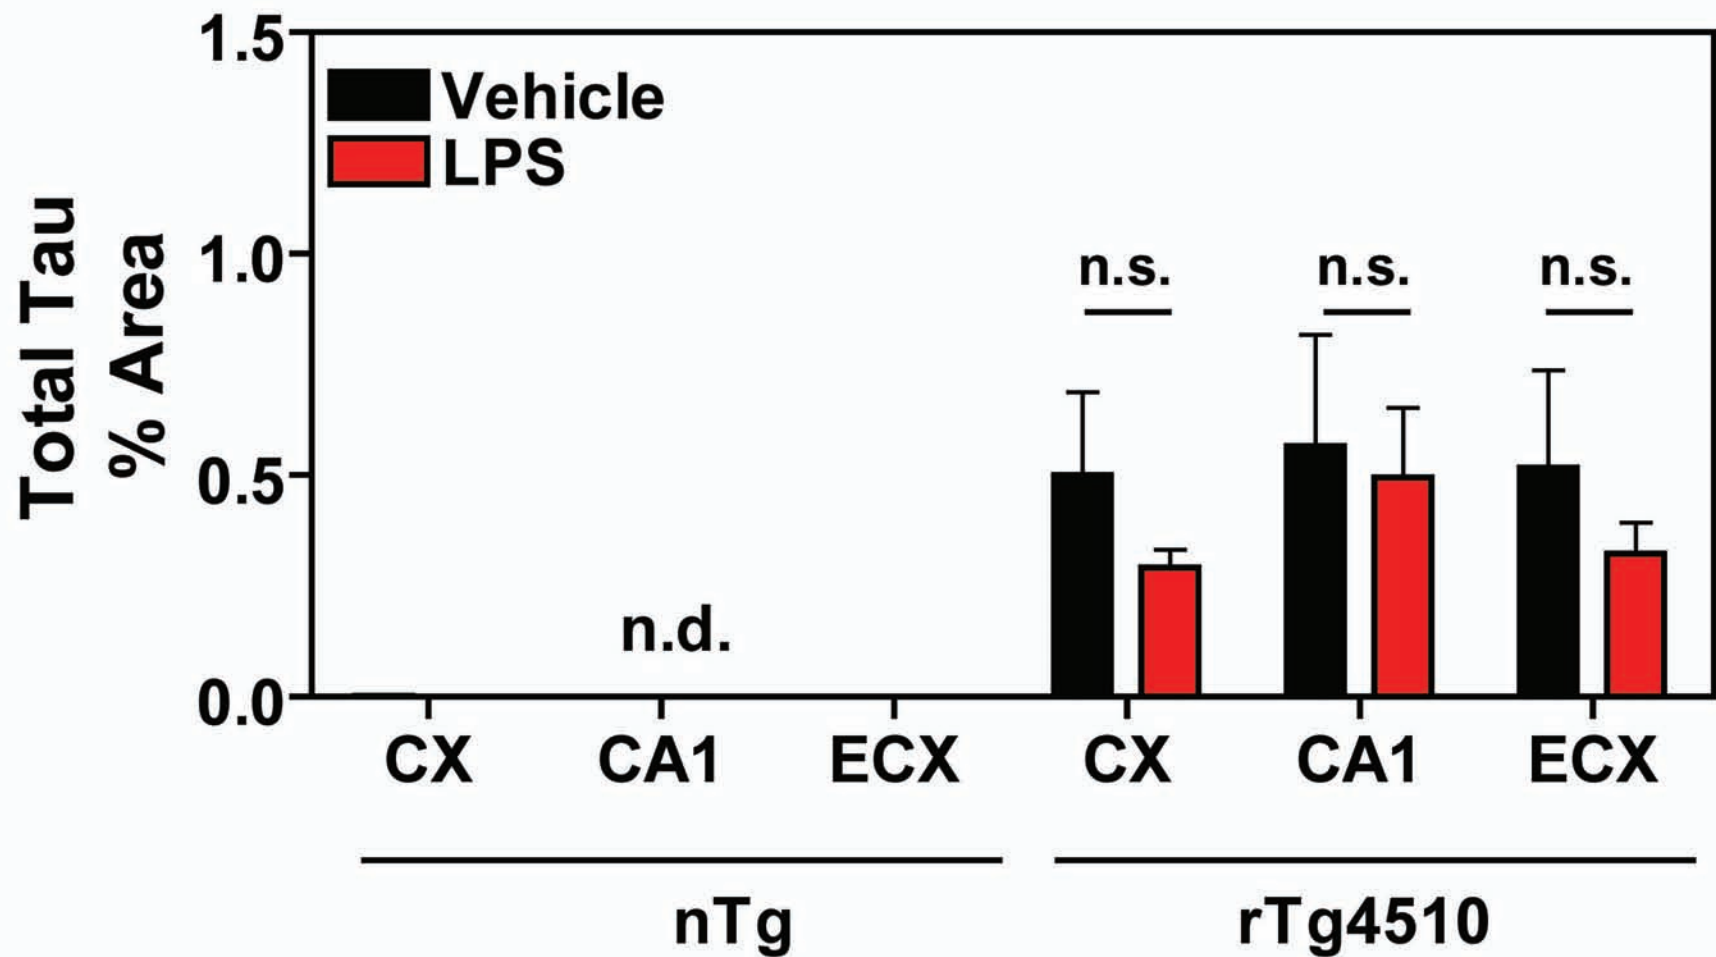

Supplement: MOESM8 [file 9601128]
